# Supplementary material for: Rapid Sublingual Delivery of Piroxicam from Electrospun Cyclodextrin Inclusion Complex Nanofibers
Source: PubMed Central journal article supplement (PMC9535703; doi:10.1021/acsomega.2c03987), 2022-09-19
Supplement: ao2c03987_si_001.pdf [file ao2c03987_si_001.pdf]

Supporting Information

for

Rapid Sublingual Delivery of Piroxicam from Electrospun  
Cyclodextrin Inclusion-Complex Nanofibers

Fuat Topuz\*

Department of Chemistry, Faculty of Science and Letters, Istanbul Technical University, Sariyer  
34467, Istanbul (Turkey)

---

\*Corresponding author: Dr. F. Topuz (Email: [topuzf@itu.edu.tr](mailto:topuzf@itu.edu.tr) & [fuat.topuz@rwth-aachen.de](mailto:fuat.topuz@rwth-aachen.de))

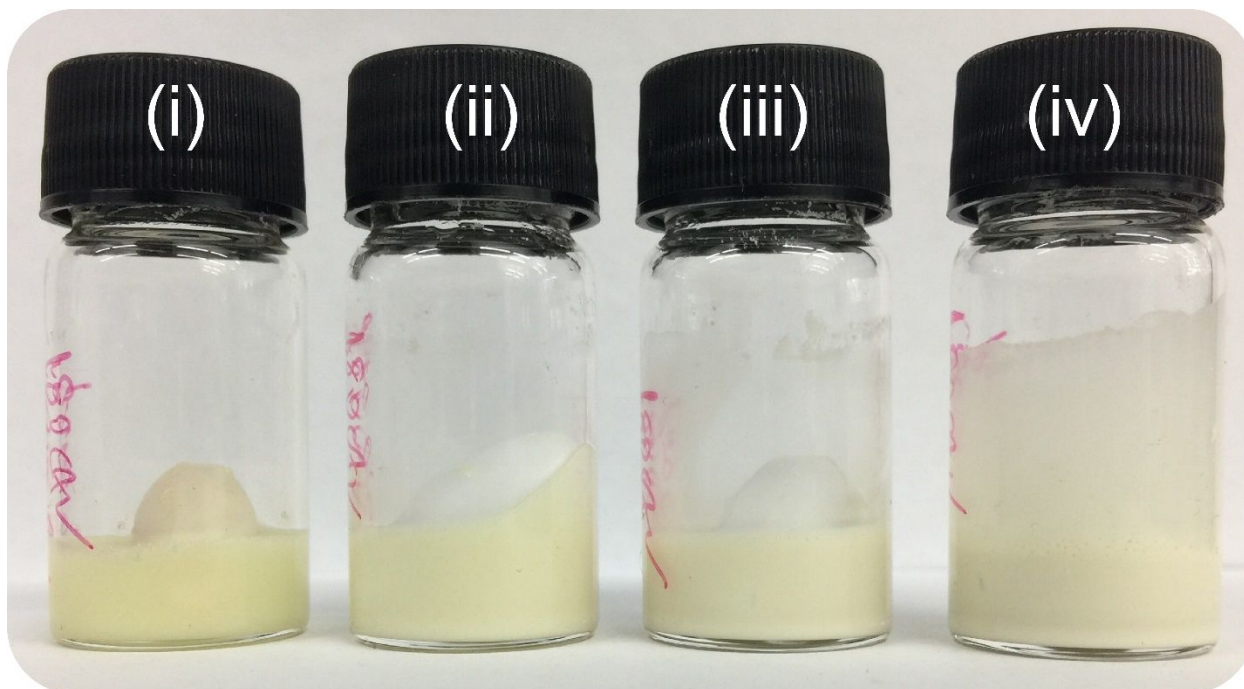

**Figure S1.** A photograph of aqueous solutions of HP- $\beta$ -CD/Px at various molar ratios ((i) 0.1:1, (ii) 0.25:1, 0.5:1 and 1:1).

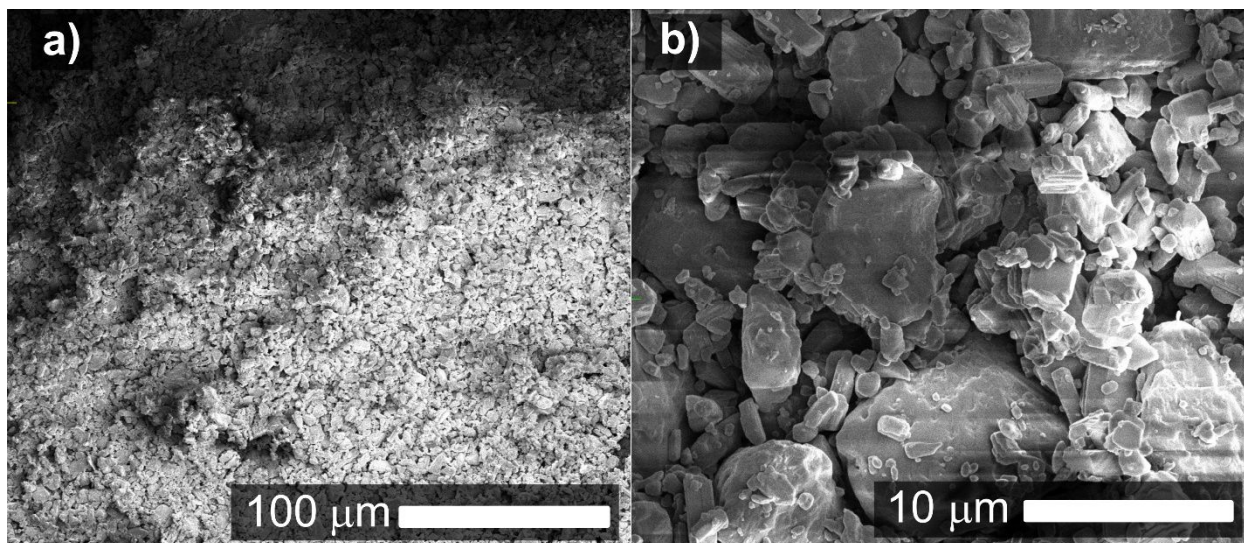

**Figure S2.** Scanning electron micrographs of piroxicam (Px) powder at different magnifications (a, b)

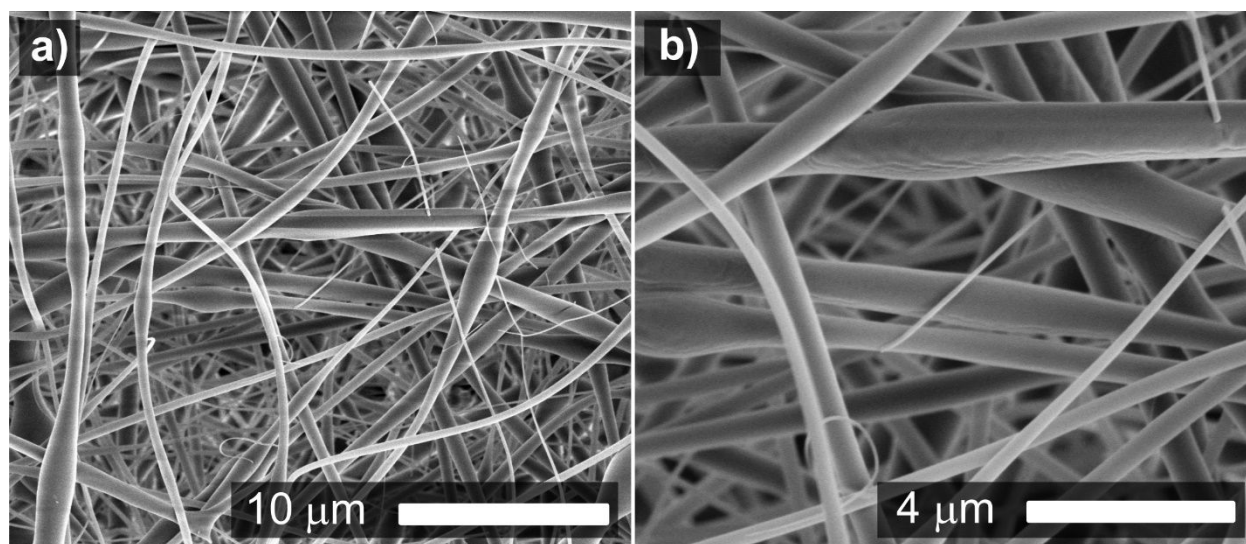

**Figure S3.** (a, b) Scanning electron micrographs of HP- $\beta$ -CD fibers at different magnifications produced at 180% (w/v) in water. The applied voltage : 15 kV, the tip-to-collector distance : 15 cm, and the flow rate : 0.5 mL h<sup>-1</sup>.
